# Supplementary material for: Inferring Short-Range Linkage Information from Sequencing Chromatograms
Source: PLoS One. 2013 Dec 20;8(12):e81687. doi: 10.1371/journal.pone.0081687 (PMC3869653; doi:10.1371/journal.pone.0081687)
Supplement: Table S1 — Composition of the in vitro test set 1 (TS1) and test set 2 (TS2). (XLS) [file pone.0081687.s001.xls]

## Sheet: Sheet1
	Number of test samples
True mixture components	Test set 1 (TS1)	Test set 2 (TS2)
M1+4	8	6
M2+3	8	6
M1+2+3	4	6
M1+3+4	2	6
M1+2+4	3	6
M2+3+4	2	6
M1+2+3+4	2	6
